# Supplementary material for: Exometabolomic exploration of culturable airborne microorganisms from an urban atmosphere
Source: Copernicus journal article supplement (doi:10.5194/egusphere-2024-1880), 2024-06-25
Supplement: Supplementary file 1 [file egusphere-2024-1880-supplement.pdf]

## *Supplement of*

# **Exometabolomic exploration of culturable airborne microorganisms from an urban atmosphere**

5 Rui Jin<sup>1</sup>, Wei Hu<sup>1,2\*</sup>, Peimin Duan<sup>1</sup>, Ming Sheng<sup>1</sup>, Dandan Liu<sup>1</sup>, Ziyi Huang<sup>1</sup>, Mutong Niu<sup>1</sup>, Libin Wu<sup>1</sup>,  
Junjun Deng<sup>1</sup>, Pingqing Fu<sup>1,3\*</sup>

<sup>1</sup>Institute of Surface-Earth System Science, School of Earth System Science, Tianjin University, Tianjin 300072, China

<sup>2</sup>Tianjin Bohai Rim Coastal Earth Critical Zone National Observation and Research Station, Tianjin University, Tianjin 300072, China

10 <sup>3</sup>Tianjin Key Laboratory of Earth Critical Zone Science and Sustainable Development in Bohai Rim, Tianjin University, Tianjin 300072, China

*Correspondence to:* Wei Hu (huwei@tju.edu.cn); Pingqing Fu (fupingqing@tju.edu.cn).

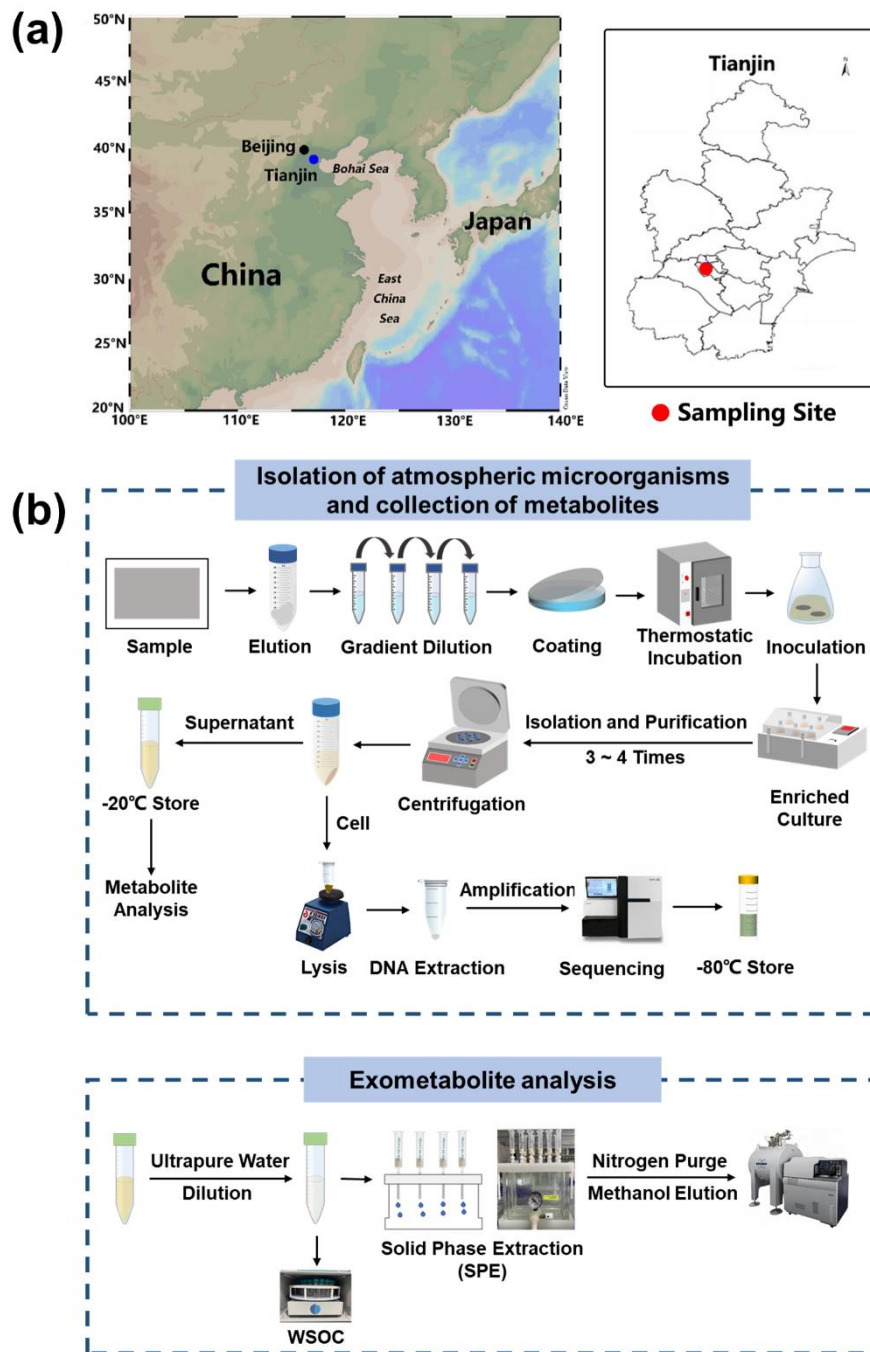

15 **Figure S1.** The location of culturable airborne microorganisms and experimental procedures. (a) The map shows the location of Tianjin city and the sampling site in the Nankai district, Tianjin (the map is from Ocean Data View). (b) Experimental procedures include the isolation of atmospheric microorganisms, collection of metabolites, and exometabolite analysis.

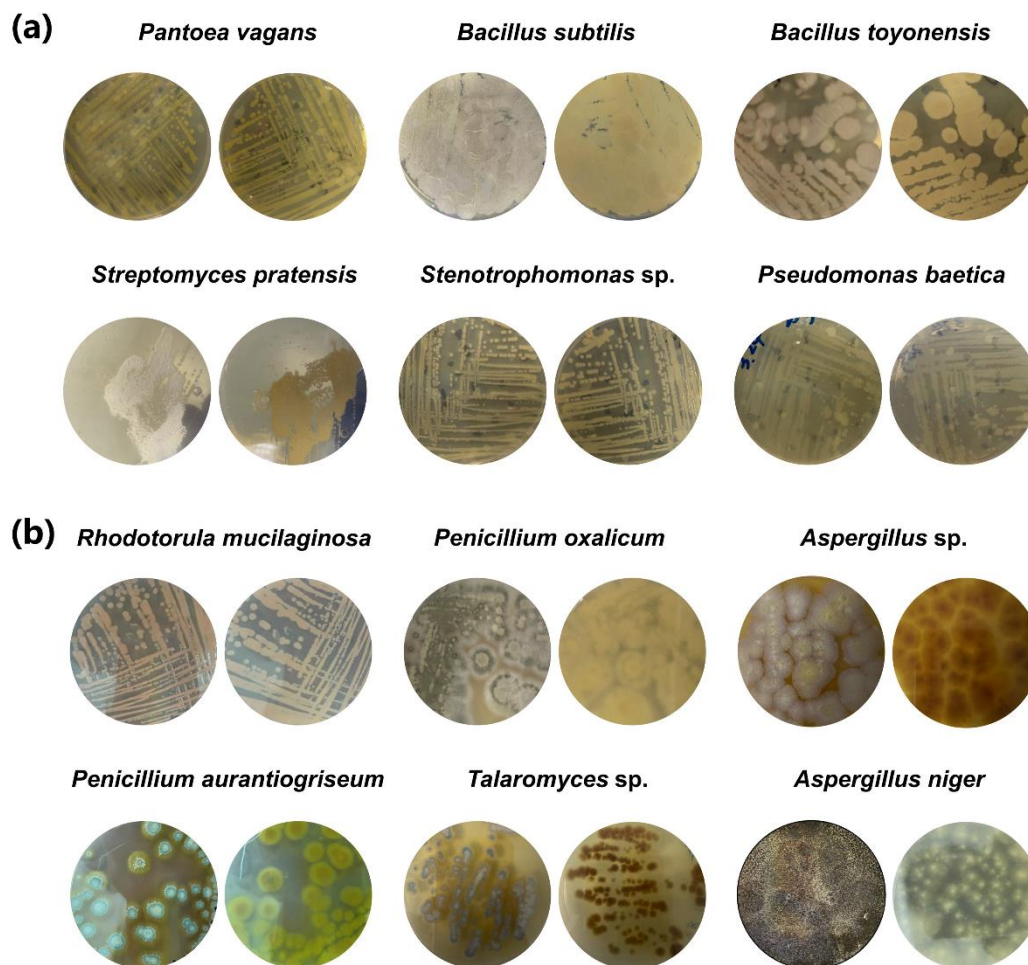

20 **Figure S2.** The representative bacterial (a) and fungal (b) strains isolated atmospheric microorganisms.

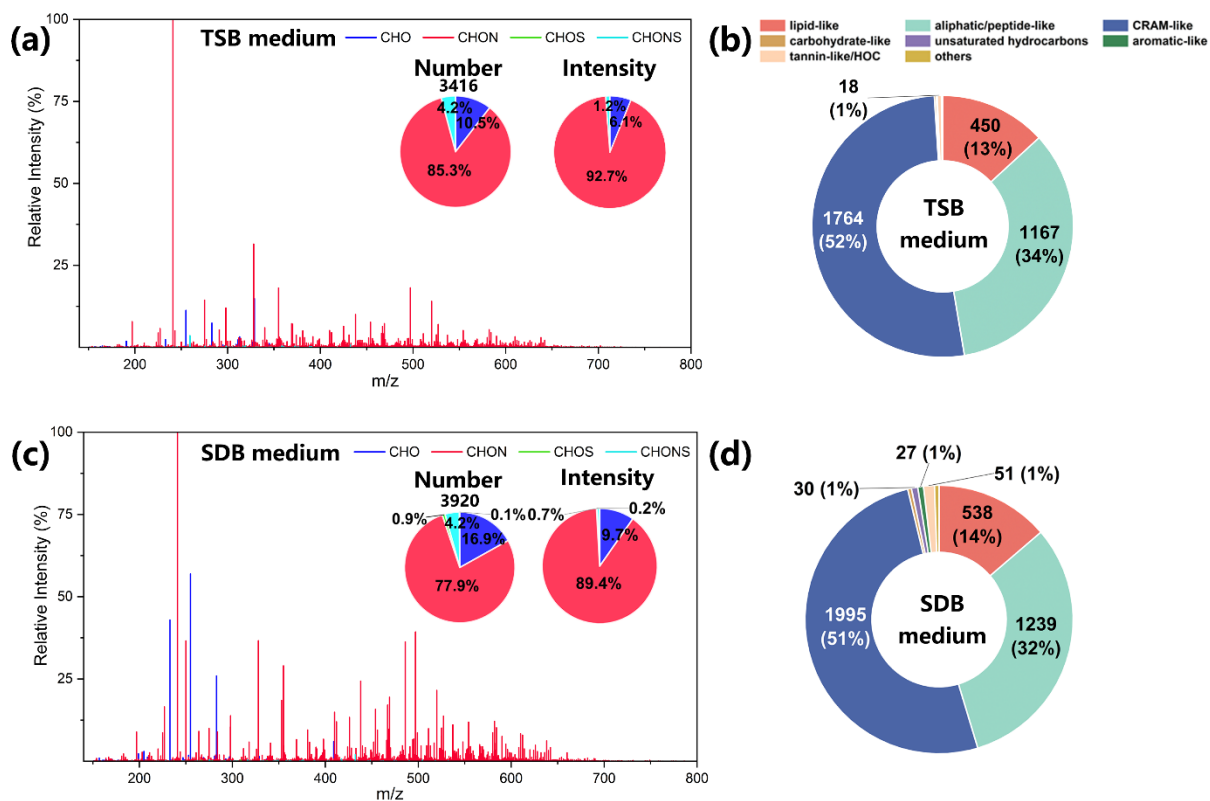

25 **Figure S3.** Mass spectra and different categories of organics in the initial medium. The subfigures on the left illustrate the mass spectra and elemental compositions of TSB (a) and SDB (c) media. The right subfigures display the formula numbers of different categories of organic matter for TSB (b) and SDB (d) media.

### (a) Bacteria

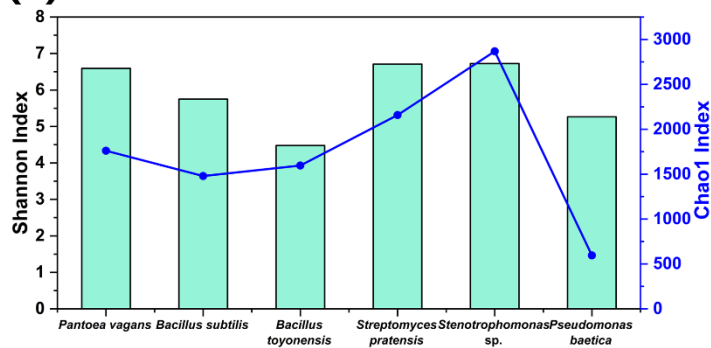

### (c)

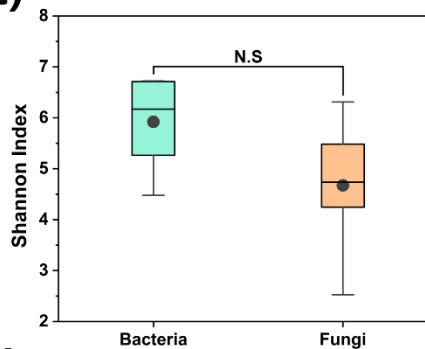

### (b) Fungi

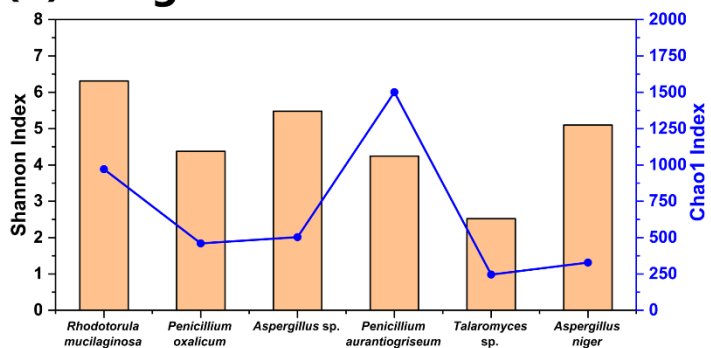

### (d)

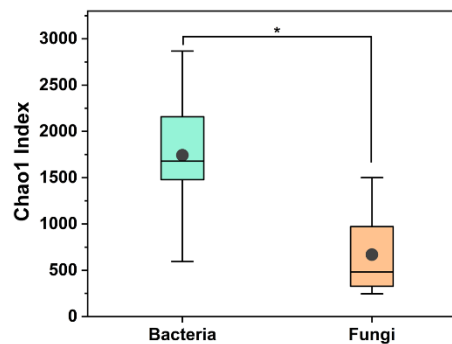

**Figure S4.** The molecular diversity of bacterial and fungal exometabolites. The two subfigures on the left illustrate the molecular diversity of bacterial (a) and fungal (b) exometabolites and compare the Shannon index (c) and Chao1 index (d).

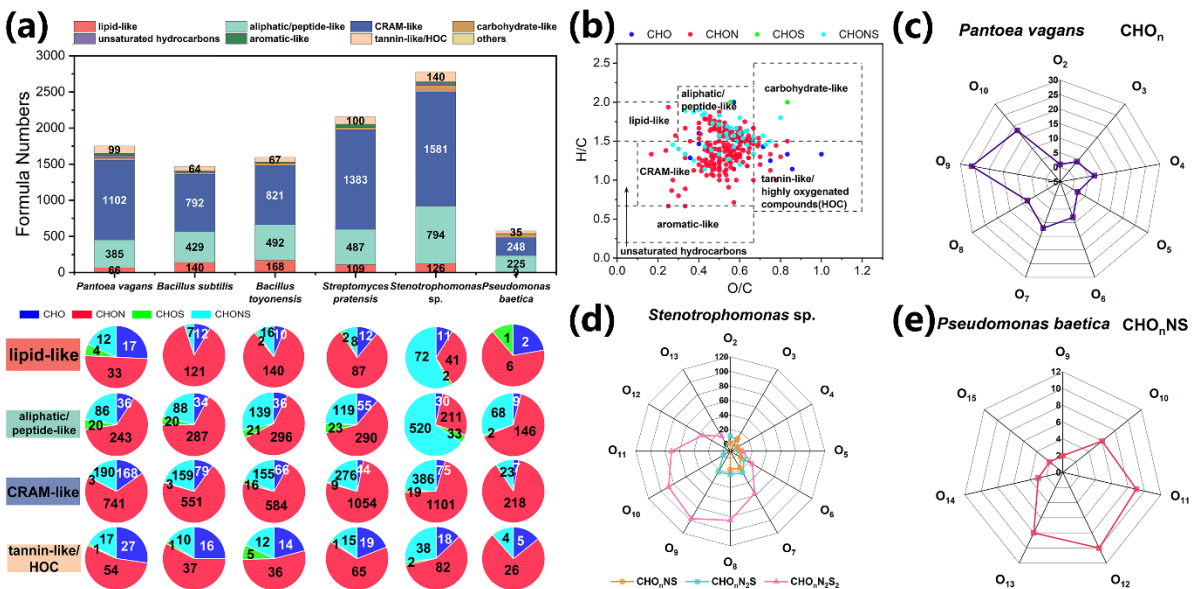

30

35

**Figure S5.** The formula categories in bacterial exometabolites and differences in the molecular composition of shared and unique exometabolites among bacterial strains. (a) Stacked bars illustrate formula categories based on H/C and O/C ratios in bacterial exometabolites, and pie charts illustrate the elemental compositions of high abundance categories. (b) van Krevelen diagrams illustrate the shared molecules. Radar maps show the distribution of oxygen number of unique CHO compounds in exometabolites from *Pantoea vagans* (c) and the distribution of oxygen number of unique CHONS compounds in exometabolites from *Stenotrophomonas sp.* (d) and *Pseudomonas baetica* (e).

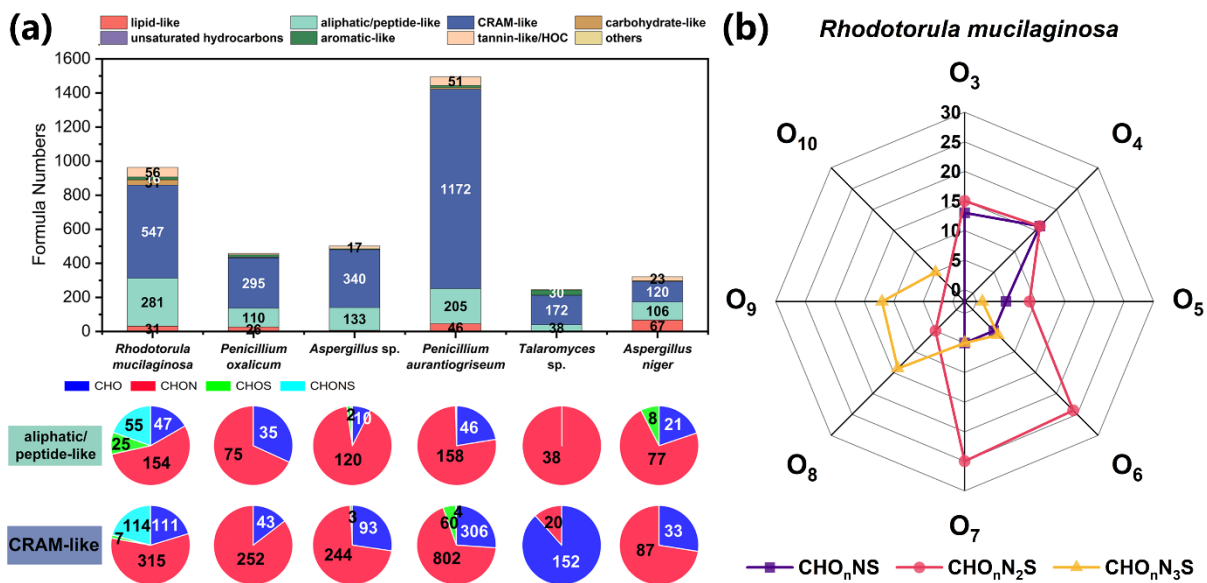

**Figure S6.** The formula categories in fungal exometabolites (a) and the distribution of oxygen number of unique CHONS compounds in exometabolites from *Rhodotorula mucilaginosa* (b). Stacked bars illustrate formula categories based on H/C and O/C ratios in fungal exometabolites, and pie charts illustrate the elemental compositions of high abundance categories.

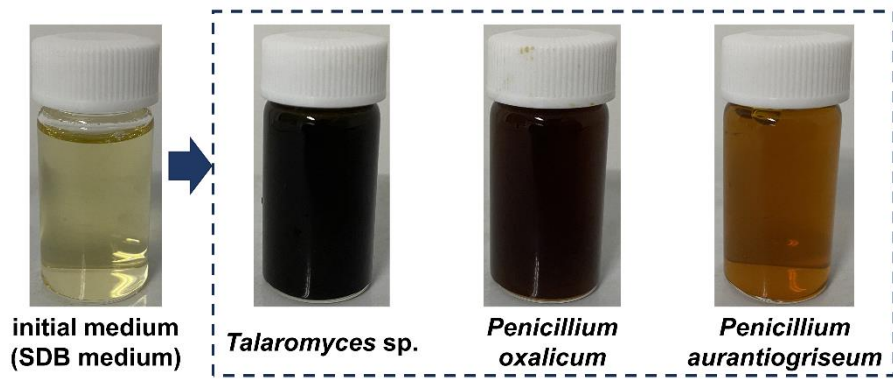

**Figure S7.** Changes in the supernatant of the genera *Penicillium* and *Talaromyces* culture medium after 14 days.



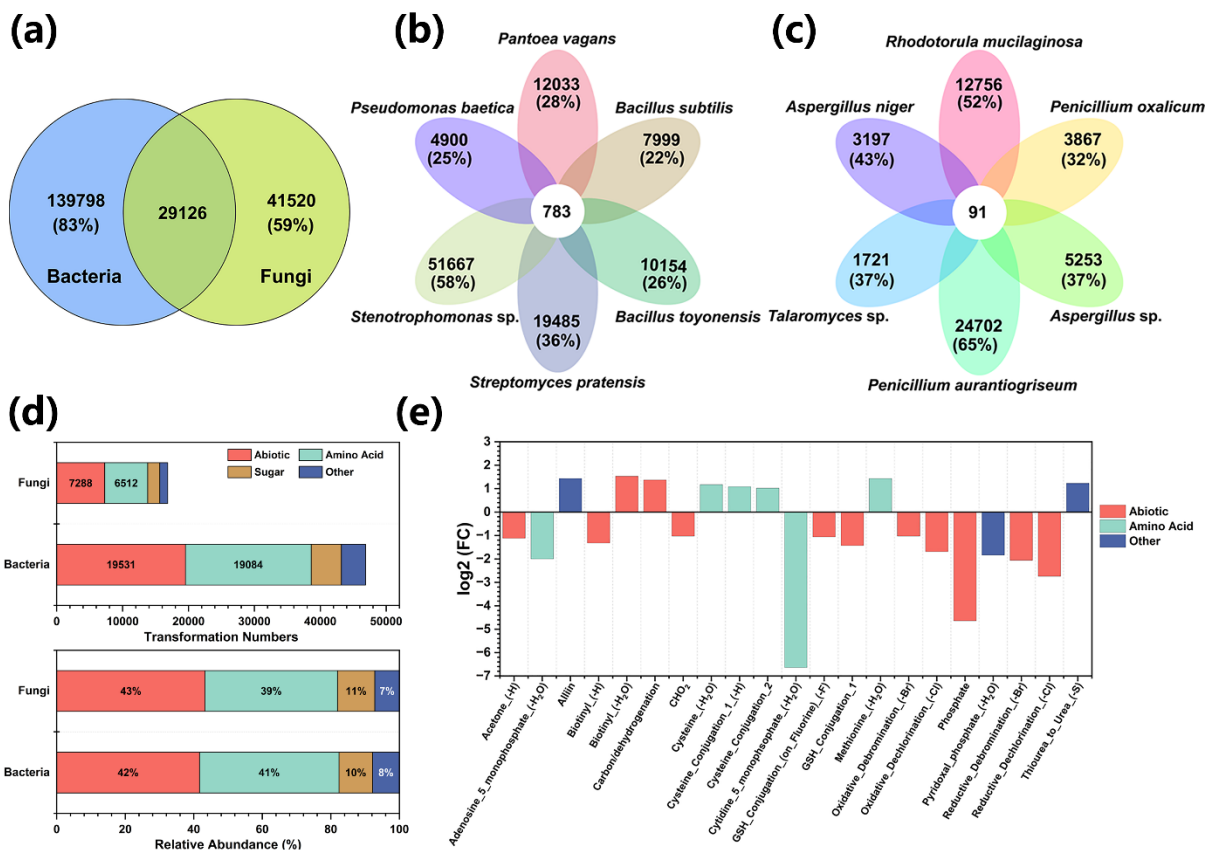

45 **Figure S8.** The differences in molecular transformations of bacteria and fungi. Venn diagrams display the numbers and percentages of shared and unique potential molecular transformations of bacteria and fungi (a), typical bacteria (b), and typical fungi (c). The percentages in the graph represent the ratio of unique transformations to the total number of transformations of the strain. (d) Bar diagrams show the grouped distribution of the transformation numbers and the relative abundance of bacteria and fungi. (e) Bar diagram illustrates the distribution of transformation types with significant differences (Fold Change (FC)  $\geq 2$  or  $\leq 0.5$ ) between bacteria and fungi.  $\log_2(FC) \geq 0$  indicates that this transformation type is more significantly represented in bacteria.

50

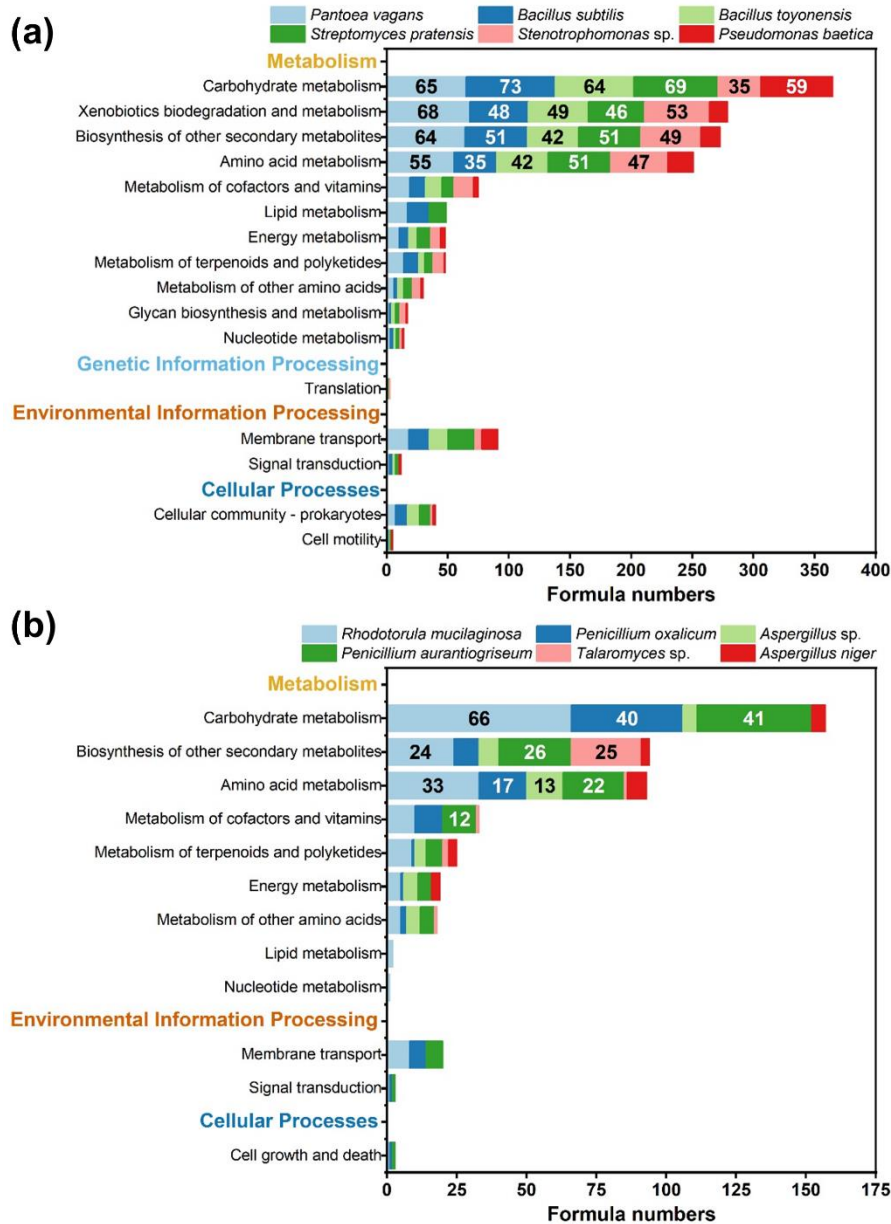

**Figure S9.** The KEGG metabolic pathways of typical bacterial (a) and fungal (b) strains enriched and analyzed based on their exometabolites, including both primary and secondary pathways.

55 **Table S1** Compositions of the media used for isolation of culturable bacteria and fungi in the urban atmosphere.

| <b>Component</b>       | <b>Tryptic soy agar (TSA)</b> | <b>Sabouraud dextrose agar (SDA)</b> |
|------------------------|-------------------------------|--------------------------------------|
| Tryptone               | 15 g                          | -                                    |
| Soy peptone            | 5 g                           | -                                    |
| NaCl                   | 5 g                           | -                                    |
| Peptone                | -                             | 10 g                                 |
| Glucose                | -                             | 40 g                                 |
| Agar                   | 15 g                          | 20 g                                 |
| Double distilled water | 1000 mL                       | 1000 mL                              |

**Table S2** Identities of cultivable bacteria derived from aerosol samples.

| Isolate ID | Isolate                                | BLAST Identity                      | % Identity | Phylum         | Class               | Order            | Family            |
|------------|----------------------------------------|-------------------------------------|------------|----------------|---------------------|------------------|-------------------|
| B1         | <i>Bacillus</i> sp. B1                 | <i>Bacillus</i> sp.                 | 99.93%     | Firmicutes     | Bacilli             | Bacillales       | Bacillaceae       |
| B2         | <i>Pantoea vagans</i> B1               | <i>Pantoea vagans</i>               | 100.00%    | Proteobacteria | Gammaproteobacteria | Enterobacterales | Erwiniaceae       |
| B3         | <i>Streptomyces thermoviolaceus</i> B1 | <i>Streptomyces thermoviolaceus</i> | 100.00%    | Actinobacteria | Actinobacteria      | Streptomycetales | Streptomycetaceae |
| B4         | <i>Bacillus subtilis</i> B1            | <i>Bacillus subtilis</i>            | 99.17%     | Firmicutes     | Bacilli             | Bacillales       | Bacillaceae       |
| B5         | <i>Streptomyces thermoviolaceus</i> B2 | <i>Streptomyces thermoviolaceus</i> | 99.93%     | Actinobacteria | Actinobacteria      | Streptomycetales | Streptomycetaceae |
| B6         | <i>Bacillus</i> sp. B2                 | <i>Bacillus</i> sp. Y1(2012)        | 99.93%     | Firmicutes     | Bacilli             | Bacillales       | Bacillaceae       |
| B7         | <i>Bacillus subtilis</i> B2            | <i>Bacillus subtilis</i>            | 100.00%    | Firmicutes     | Bacilli             | Bacillales       | Bacillaceae       |
| B8         | <i>Erwinia</i> sp. B1                  | <i>Erwinia</i> sp.                  | 100.00%    | Proteobacteria | Gammaproteobacteria | Enterobacterales | Erwiniaceae       |
| B9         | <i>Erwinia</i> sp. B1                  | <i>Erwinia</i> sp.                  | 100.00%    | Proteobacteria | Gammaproteobacteria | Enterobacterales | Erwiniaceae       |
| B10        | <i>Streptomyces pratensis</i> B1       | <i>Streptomyces pratensis</i>       | 99.12%     | Actinobacteria | Actinobacteria      | Streptomycetales | Streptomycetaceae |
| B11        | <i>Streptomyces</i> sp. B1             | <i>Streptomyces</i> sp. SYP-A7193   | 99.93%     | Actinobacteria | Actinobacteria      | Streptomycetales | Streptomycetaceae |
| B12        | <i>Bacillus</i> sp. B3                 | <i>Bacillus</i> sp. 210_62          | 99.72%     | Firmicutes     | Bacilli             | Bacillales       | Bacillaceae       |
| B13        | <i>Pseudomonas</i> sp. B1              | <i>Pseudomonas</i> sp.              | 99.93%     | Proteobacteria | Gammaproteobacteria | Pseudomonadales  | Pseudomonadaceae  |
| B14        | <i>Pantoea vagans</i> B2               | <i>Pantoea vagans</i>               | 99.32%     | Proteobacteria | Gammaproteobacteria | Enterobacterales | Erwiniaceae       |
| B15        | <i>Pseudomonas</i> sp. B2              | <i>Pseudomonas</i> sp. B14-6        | 100.00%    | Proteobacteria | Gammaproteobacteria | Pseudomonadales  | Pseudomonadaceae  |
| B16        | <i>Stenotrophomonas</i> sp. B1         | <i>Stenotrophomonas</i> sp.         | 99.79%     | Proteobacteria | Gammaproteobacteria | Xanthomonadales  | Xanthomonadaceae  |
| B17        | <i>Pseudomonas fluorescens</i> B1      | <i>Pseudomonas fluorescens</i>      | 100.00%    | Proteobacteria | Gammaproteobacteria | Pseudomonadales  | Pseudomonadaceae  |
| B18        | <i>Bacillus toyonensis</i> B1          | <i>Bacillus toyonensis</i>          | 100.00%    | Firmicutes     | Bacilli             | Bacillales       | Bacillaceae       |
| B19        | <i>Pseudomonas</i> sp. B3              | <i>Pseudomonas</i> sp.              | 99.71%     | Proteobacteria | Gammaproteobacteria | Pseudomonadales  | Pseudomonadaceae  |
| B20        | <i>Bacillus halotolerans</i> B1        | <i>Bacillus halotolerans</i>        | 100.00%    | Firmicutes     | Bacilli             | Bacillales       | Bacillaceae       |
| B21        | <i>Bacillus proteolyticus</i> B1       | <i>Bacillus proteolyticus</i>       | 100.00%    | Firmicutes     | Bacilli             | Bacillales       | Bacillaceae       |
| B22        | <i>Bacillus safensis</i> B1            | <i>Bacillus safensis</i>            | 100.00%    | Firmicutes     | Bacilli             | Bacillales       | Bacillaceae       |
| B23        | <i>Pseudomonas baetica</i> B1          | <i>Pseudomonas baetica</i>          | 100.00%    | Proteobacteria | Gammaproteobacteria | Pseudomonadales  | Pseudomonadaceae  |
| B24        | <i>Pseudomonas</i> sp. B4              | <i>Pseudomonas</i> sp.              | 99.85%     | Proteobacteria | Gammaproteobacteria | Pseudomonadales  | Pseudomonadaceae  |

**Table S3** Identities of cultivable fungi derived from aerosol samples.

| Isolate ID | Isolate                                 | BLAST Identity                       | % Identity | Phylum        | Class              | Order           | Family           |
|------------|-----------------------------------------|--------------------------------------|------------|---------------|--------------------|-----------------|------------------|
| F1         | <i>Trametes elegans</i> F1              | <i>Trametes elegans</i>              | 100.00%    | Basidiomycota | Agaricomycetes     | Polyporales     | Polyporaceae     |
| F2         | <i>Talaromyces</i> sp. F1               | <i>Talaromyces</i> sp.               | 100.00%    | Ascomycota    | Eurotiomycetes     | Eurotiales      | Trichocomaceae   |
| F3         | <i>Aspergillus niger</i> F1             | <i>Aspergillus niger</i>             | 100.00%    | Ascomycota    | Eurotiomycetes     | Eurotiales      | Aspergillaceae   |
| F4         | <i>Aspergillus</i> sp. F1               | <i>Aspergillus</i> sp.               | 100.00%    | Ascomycota    | Eurotiomycetes     | Eurotiales      | Aspergillaceae   |
| F5         | <i>Aspergillus</i> sp. F2               | <i>Aspergillus</i> sp.               | 100.00%    | Ascomycota    | Eurotiomycetes     | Eurotiales      | Aspergillaceae   |
| F6         | <i>Aspergillus nidulans</i> F1          | <i>Aspergillus nidulans</i>          | 100.00%    | Ascomycota    | Eurotiomycetes     | Eurotiales      | Aspergillaceae   |
| F7         | <i>Penicillium oxalicum</i> F1          | <i>Penicillium oxalicum</i>          | 100.00%    | Ascomycota    | Eurotiomycetes     | Eurotiales      | Aspergillaceae   |
| F8         | <i>Sarocladium terricola</i> F1         | <i>Sarocladium terricola</i>         | 100.00%    | Ascomycota    | Sordariomycetes    | Hypocreales     | Sarocladiaceae   |
| F9         | <i>Penicillium sumatraense</i> F1       | <i>Penicillium sumatraense</i>       | 100.00%    | Ascomycota    | Eurotiomycetes     | Eurotiales      | Aspergillaceae   |
| F10        | <i>Penicillium aurantiogriseum</i> F1   | <i>Penicillium aurantiogriseum</i>   | 100.00%    | Ascomycota    | Eurotiomycetes     | Eurotiales      | Aspergillaceae   |
| F11        | <i>Aspergillus</i> sp. F3               | <i>Aspergillus</i> sp.               | 100.00%    | Ascomycota    | Eurotiomycetes     | Eurotiales      | Aspergillaceae   |
| F12        | <i>Aspergillus carneus</i> F1           | <i>Aspergillus carneus</i>           | 100.00%    | Ascomycota    | Eurotiomycetes     | Eurotiales      | Aspergillaceae   |
| F13        | <i>Cladosporium parahalotolerans</i> F1 | <i>Cladosporium parahalotolerans</i> | 100.00%    | Ascomycota    | Dothideomycetes    | Cladosporiales  | Cladosporiaceae  |
| F14        | <i>Rhodotorula mucilaginosa</i> F1      | <i>Rhodotorula mucilaginosa</i>      | 100.00%    | Basidiomycota | Microbotryomycetes | Sporidiobolales | Sporidiobolaceae |
| F15        | <i>Penicillium cinnamopurpureum</i> F1  | <i>Penicillium cinnamopurpureum</i>  | 100.00%    | Ascomycota    | Eurotiomycetes     | Eurotiales      | Aspergillaceae   |
| F16        | <i>Cladosporium</i> sp. F1              | <i>Cladosporium</i> sp.              | 99.42%     | Ascomycota    | Dothideomycetes    | Cladosporiales  | Cladosporiaceae  |

**Table S4** The bacterial and fungal isolates used for exometabolomic studies.

| <b>Kingdom</b> | <b>Isolate ID</b> | <b>Isolate</b>                     | <b>Type</b>            |
|----------------|-------------------|------------------------------------|------------------------|
| Bacteria       | B2                | <i>Pantoea vagans</i>              | Gram-negative bacteria |
|                | B4                | <i>Bacillus subtilis</i>           | Gram-positive bacteria |
|                | B18               | <i>Bacillus toyonensis</i>         | Gram-positive bacteria |
|                | B10               | <i>Streptomyces pratensis</i>      | Gram-positive bacteria |
|                | B16               | <i>Stenotrophomonas</i> sp.        | Gram-negative bacteria |
|                | B23               | <i>Pseudomonas baetica</i>         | Gram-negative bacteria |
| Fungi          | F14               | <i>Rhodotorula mucilaginosa</i>    | yeast                  |
|                | F7                | <i>Penicillium oxalicum</i>        | mold                   |
|                | F5                | <i>Aspergillus</i> sp.             | mold                   |
|                | F10               | <i>Penicillium aurantiogriseum</i> | mold                   |
|                | F2                | <i>Talaromyces</i> sp.             | mold                   |
|                | F3                | <i>Aspergillus niger</i>           | mold                   |

**Table S5** Changes in the number of formulas after incubation for bacteria and fungi.

| Sample                             | Culture nutrients | Consumed | Resistant | Produced | Total |
|------------------------------------|-------------------|----------|-----------|----------|-------|
| Before incubation                  |                   |          |           |          |       |
| TSB                                | -                 | -        | -         | -        | 3416  |
| SDB                                | -                 | -        | -         | -        | 3920  |
| After incubation                   |                   |          |           |          |       |
| <i>Pantoea vagans</i>              | TSB               | 413      | 3003      | 1761     | 4764  |
| <i>Bacillus subtilis</i>           | TSB               | 477      | 2939      | 1479     | 4418  |
| <i>Bacillus toyonensis</i>         | TSB               | 708      | 2708      | 1596     | 4304  |
| <i>Streptomyces pratensis</i>      | TSB               | 689      | 2727      | 2158     | 4885  |
| <i>Stenotrophomonas</i> sp.        | TSB               | 1198     | 2218      | 2868     | 5086  |
| <i>Pseudomonas baetica</i>         | TSB               | 1122     | 2294      | 651      | 2945  |
| After incubation                   |                   |          |           |          |       |
| <i>Rhodotorula mucilaginosa</i>    | SDB               | 811      | 3109      | 971      | 4080  |
| <i>Penicillium oxalicum</i>        | SDB               | 1362     | 2558      | 460      | 3018  |
| <i>Aspergillus</i> sp.             | SDB               | 2049     | 1871      | 503      | 2374  |
| <i>Penicillium aurantiogriseum</i> | SDB               | 1262     | 2658      | 1501     | 4159  |
| <i>Talaromyces</i> sp.             | SDB               | 2531     | 1389      | 246      | 1635  |
| <i>Aspergillus niger</i>           | SDB               | 1689     | 2231      | 328      | 2559  |

70 **Table S6** The molecular weight distribution of the typical bacterial and fungal exometabolites.

| Sample                             | Low Molecular Weight (LMW)<br>(150 – 300 Da) | Medium Molecular Weight (MMW)<br>(300 – 500 Da) | High Molecular Weight (HMW)<br>(500 – 800 Da) | Total        |
|------------------------------------|----------------------------------------------|-------------------------------------------------|-----------------------------------------------|--------------|
| Bacteria                           |                                              |                                                 |                                               |              |
| <i>Pantoea vagans</i>              | 617<br>35.04%                                | 837<br>47.53%                                   | 307<br>17.43%                                 | 1761<br>100% |
| <i>Bacillus subtilis</i>           | 460<br>31.10%                                | 731<br>49.43%                                   | 288<br>19.47%                                 | 1479<br>100% |
| <i>Bacillus toyonensis</i>         | 540<br>33.83%                                | 774<br>48.50%                                   | 282<br>17.67%                                 | 1596<br>100% |
| <i>Streptomyces pratensis</i>      | 665<br>30.82%                                | 1034<br>47.91%                                  | 459<br>21.27%                                 | 2158<br>100% |
| <i>Stenotrophomonas</i> sp.        | 721<br>25.14%                                | 1244<br>43.38%                                  | 903<br>31.49%                                 | 2868<br>100% |
| <i>Pseudomonas baetica</i>         | 123<br>18.89%                                | 252<br>38.71%                                   | 276<br>42.40%                                 | 651<br>100%  |
| Fungi                              |                                              |                                                 |                                               |              |
| <i>Rhodotorula mucilaginosa</i>    | 318<br>32.75%                                | 518<br>53.35%                                   | 135<br>13.90%                                 | 971<br>100%  |
| <i>Penicillium oxalicum</i>        | 100<br>21.74%                                | 222<br>48.26%                                   | 138<br>30.00%                                 | 460<br>100%  |
| <i>Aspergillus</i> sp.             | 78<br>15.51%                                 | 299<br>59.44%                                   | 126<br>25.05%                                 | 503<br>100%  |
| <i>Penicillium aurantiogriseum</i> | 187<br>12.46%                                | 929<br>61.89%                                   | 385<br>26.65%                                 | 1501<br>100% |
| <i>Talaromyces</i> sp.             | 54<br>21.95%                                 | 164<br>66.67%                                   | 28<br>11.38%                                  | 246<br>100%  |
| <i>Aspergillus niger</i>           | 55<br>16.77%                                 | 155<br>47.26%                                   | 118<br>35.98%                                 | 328<br>100%  |



**Table S7** The elemental compositions of the typical bacterial and fungal exometabolites.

| Sample                             | CHO           | CHON           | CHOS        | CHONS          | CHONSP     | Total        |
|------------------------------------|---------------|----------------|-------------|----------------|------------|--------------|
| Bacteria                           |               |                |             |                |            |              |
| <i>Pantoea vagans</i>              | 262<br>14.88% | 1131<br>64.22% | 45<br>2.56% | 318<br>18.06%  | 5<br>0.28% | 1761<br>100% |
| <i>Bacillus subtilis</i>           | 150<br>10.14% | 1022<br>69.10% | 37<br>2.50% | 270<br>18.26%  | 0<br>0.00% | 1479<br>100% |
| <i>Bacillus toyonensis</i>         | 134<br>8.40%  | 1070<br>67.04% | 52<br>3.26% | 340<br>21.30%  | 0<br>0.00% | 1596<br>100% |
| <i>Streptomyces pratensis</i>      | 137<br>6.35%  | 1552<br>71.92% | 43<br>1.99% | 426<br>19.74%  | 0<br>0.00% | 2158<br>100% |
| <i>Stenotrophomonas</i> sp.        | 140<br>4.88%  | 1494<br>52.09% | 69<br>2.41% | 1165<br>40.62% | 0<br>0.00% | 2868<br>100% |
| <i>Pseudomonas baetica</i>         | 25<br>3.84%   | 405<br>62.21%  | 5<br>0.77%  | 216<br>33.18%  | 0<br>0.00% | 651<br>100%  |
| Fungi                              |               |                |             |                |            |              |
| <i>Rhodotorula mucilaginosa</i>    | 203<br>20.91% | 525<br>54.07%  | 58<br>5.97% | 185<br>19.05%  | 0<br>0.00% | 971<br>100%  |
| <i>Penicillium oxalicum</i>        | 94<br>20.43%  | 366<br>79.57%  | 0<br>0.00%  | 0<br>0.00%     | 0<br>0.00% | 460<br>100%  |
| <i>Aspergillus</i> sp.             | 120<br>23.86% | 377<br>74.95%  | 5<br>0.99%  | 1<br>0.20%     | 0<br>0.00% | 503<br>100%  |
| <i>Penicillium aurantiogriseum</i> | 402<br>26.78% | 1017<br>67.75% | 71<br>4.73% | 10<br>0.67%    | 1<br>0.07% | 1501<br>100% |
| <i>Talaromyces</i> sp.             | 182<br>73.98% | 64<br>26.02%   | 0<br>0.00%  | 0<br>0.00%     | 0<br>0.00% | 246<br>100%  |
| <i>Aspergillus niger</i>           | 80<br>24.39%  | 233<br>71.04%  | 15<br>4.57% | 0<br>0.00%     | 0<br>0.00% | 328<br>100%  |

**Table S8** The formulas of possible pigments in exometabolites from *Penicillium* and *Talaromyces*.

| <b>Genus</b>       | <b>Strain</b>                                  | <b>Pigment</b>                | <b>Formula</b>                                  |
|--------------------|------------------------------------------------|-------------------------------|-------------------------------------------------|
| <i>Penicillium</i> | <i>Penicillium oxalicum</i>                    | Carviolin                     | C <sub>16</sub> H <sub>12</sub> O <sub>6</sub>  |
|                    |                                                | Phoenicin                     | C <sub>14</sub> H <sub>10</sub> O <sub>6</sub>  |
|                    |                                                | Naphthalic anhydride          | C <sub>21</sub> H <sub>22</sub> O <sub>9</sub>  |
|                    | <i>Penicillium aurantiogriseum</i>             | Carviolin                     | C <sub>16</sub> H <sub>12</sub> O <sub>6</sub>  |
|                    |                                                | Phoenicin                     | C <sub>14</sub> H <sub>10</sub> O <sub>6</sub>  |
|                    |                                                | Atrovenetin                   | C <sub>19</sub> H <sub>18</sub> O <sub>6</sub>  |
|                    |                                                | PP-O                          | C <sub>23</sub> H <sub>24</sub> O <sub>7</sub>  |
|                    |                                                | N-glutaryl-rubropunctamine    | C <sub>26</sub> H <sub>29</sub> NO <sub>8</sub> |
|                    |                                                | Purpurquinone-A               | C <sub>21</sub> H <sub>20</sub> O <sub>9</sub>  |
|                    |                                                | Northerqueinone               | C <sub>19</sub> H <sub>18</sub> O <sub>7</sub>  |
|                    |                                                | Xanthomonasin A               | C <sub>21</sub> H <sub>24</sub> O <sub>7</sub>  |
|                    |                                                | Trihydroxymethyl-antraquinone | C <sub>15</sub> H <sub>10</sub> O <sub>5</sub>  |
|                    |                                                | Phoenicin                     | C <sub>14</sub> H <sub>10</sub> O <sub>6</sub>  |
| Carviolin          | C <sub>16</sub> H <sub>12</sub> O <sub>6</sub> |                               |                                                 |
| <i>Talaromyces</i> | <i>Talaromyces</i> sp.                         | Naphthalic anhydride          | C <sub>21</sub> H <sub>22</sub> O <sub>9</sub>  |
|                    |                                                | Purpurquinone-A               | C <sub>21</sub> H <sub>20</sub> O <sub>9</sub>  |
|                    |                                                | Northerqueinone               | C <sub>19</sub> H <sub>18</sub> O <sub>7</sub>  |
|                    |                                                | Mitorubrinol                  | C <sub>21</sub> H <sub>18</sub> O <sub>8</sub>  |
|                    |                                                | Atrovenetin                   | C <sub>19</sub> H <sub>18</sub> O <sub>6</sub>  |
